# Supplementary material for: Straightforward synthesis of [Cu(NHC)(alkynyl)] and [Cu(NHC)(thiolato)] complexes (NHC = N-heterocyclic carbene)
Source: Royal Society of Chemistry journal article supplement (doi:10.1039/d1dt03710b), 2021-11-22

## Electronic Supporting Information

### **Straightforward synthesis of [Cu(NHC)alkynyl] and [Cu(NHC)thiolate] complexes (NHC = N-Heterocyclic Carbene)**

Ishfaq Ibni Hashim, Thomas Scattolin, Nikolaos V. Tzouras, Laurens Bourda, Kristof Van Hecke, Ida Ritacco, Lucia Caporaso, Luigi Cavallo, Steven P. Nolan, Catherine S. J. Cazin

#### Table of Contents

|                                                                                  |    |
|----------------------------------------------------------------------------------|----|
| 1. General Information .....                                                     | 2  |
| 2. Unsuccessful reactivity tests between <b>2a</b> and different substrates..... | 2  |
| 3. NMR study of spectra of IPr-Cu-alkynyl complexes.....                         | 3  |
| 4. NMR spectra of IPr*-Cu-alkynyl complexes and their derivatives.....           | 5  |
| 5. NMR spectra of NHC-Cu-thiolato complexes .....                                | 18 |

## 1. General Information

All reactions were carried out in air, unless otherwise noted. Solvents and all other reagents were purchased and used as received without further purification unless otherwise stated. Purification of compounds by filtration was performed using basic alumina or celite purchased from Sigma Aldrich, or syringe membrane filters purchased from Carl Roth. Unless otherwise noted, absolute ethanol, reagent grade acetone, deionized water and freshly crushed, anhydrous bases were used.  $^1\text{H}$ ,  $^{13}\text{C}$ - $\{^1\text{H}$ ,  $^{19}\text{F}$  Nuclear Magnetic Resonance (NMR) spectra were recorded on a Bruker Avance 400 Ultrashield, Bruker Avance 300 Ultrashield or a Bruker Avance 500 spectrometer at 298 K using the residual solvent peak as reference ( $\text{CDCl}_3$ :  $\delta_{\text{H}} = 7.26$  ppm,  $\delta_{\text{C}} = 77.16$  ppm;  $\text{C}_6\text{D}_6$ :  $\delta_{\text{H}} = 7.16$  ppm,  $\delta_{\text{C}} = 128.06$  ppm). Peaks are assigned as: s (singlet), d (doublet), t (triplet), h (heptuplet) and m (multiplet). All chlorinated solvents (including the deuterated ones) were neutralized prior to use by filtration through dried basic alumina. Elemental analyses were performed at Université de Namur, rue de Bruxelles, 55 B-5000 Namur, Belgium.

## 2. Unsuccessful reactivity tests between **2a** and different substrates.

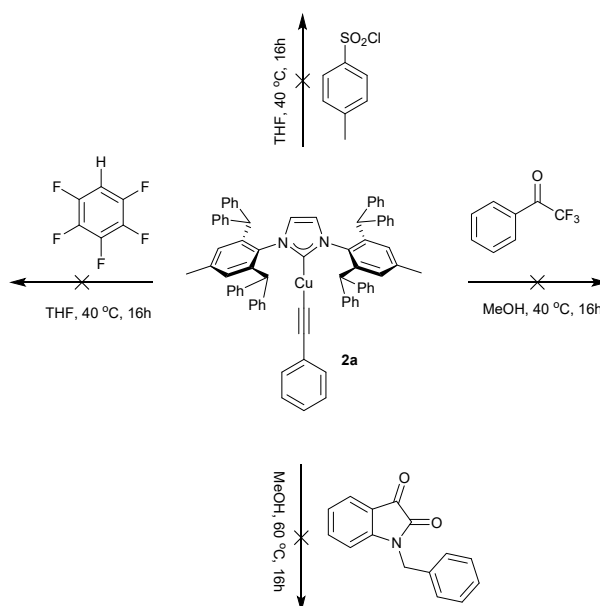

**Scheme S1.** The reactivity of complex **2a** with different substrates.

### 3. NMR study of spectra of IPr-Cu-alkynyl complexes

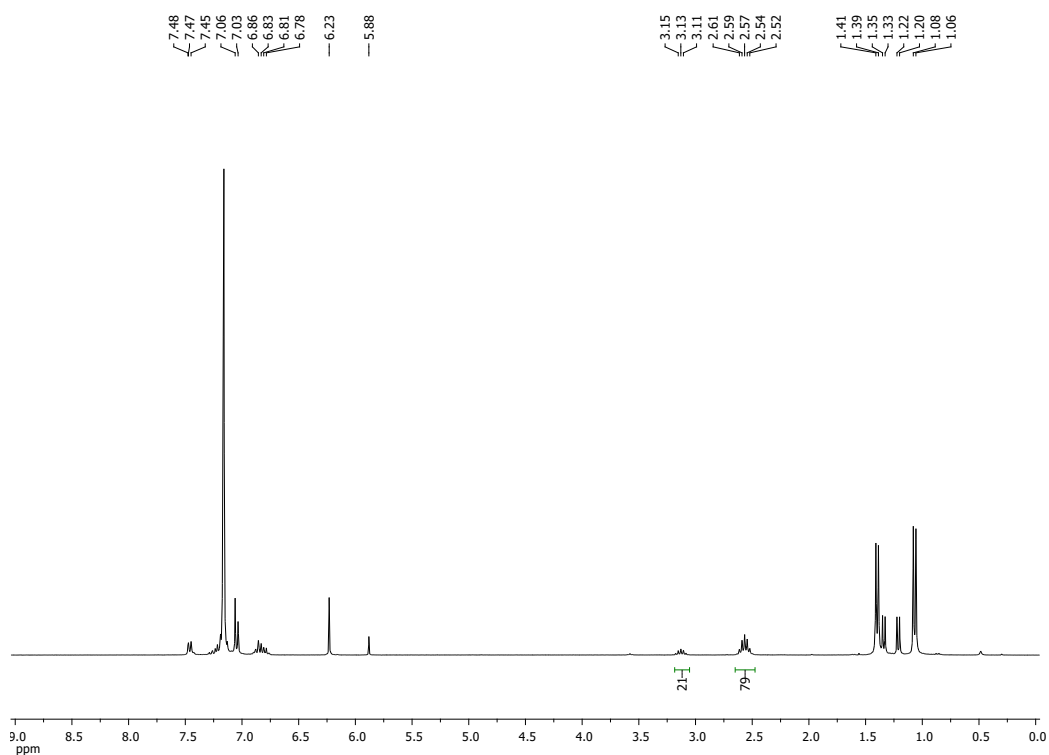

Figure S2. Disproportionation ratio of  $[\text{Cu}(\text{IPr})(\text{C}\equiv\text{CPh})]$  **1a** after 24h in benzene (79:21).

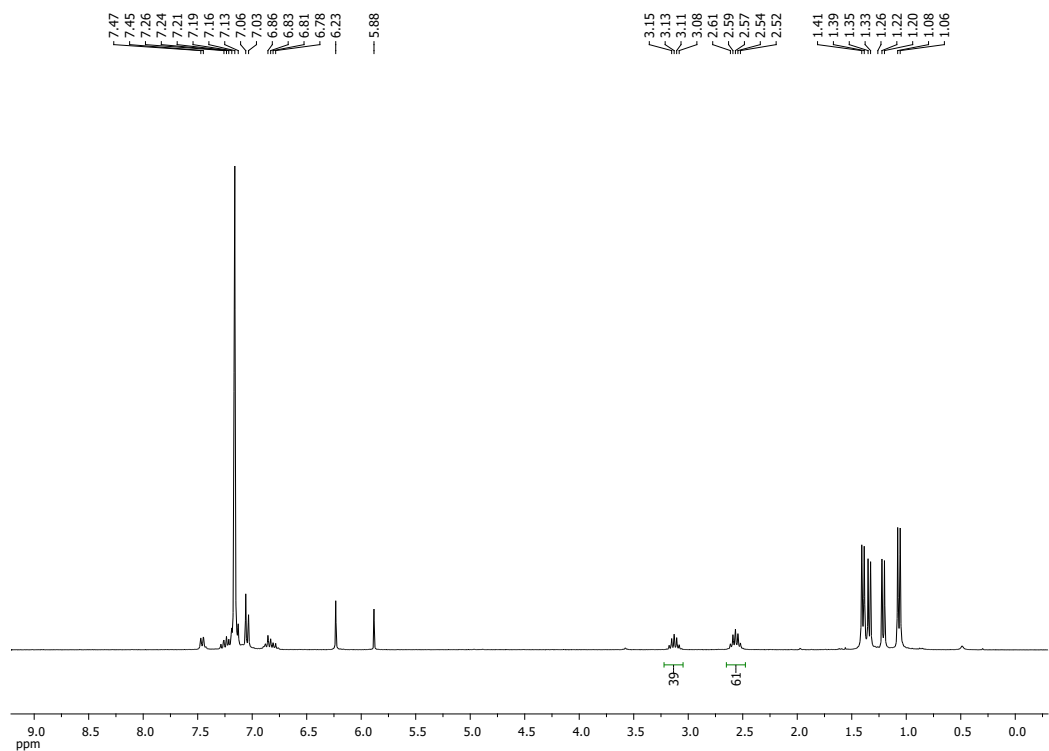

Figure S3. Disproportionation ratio of  $[\text{Cu}(\text{IPr})(\text{C}\equiv\text{CPh})]$  **1a** after 48h in benzene (61:39).

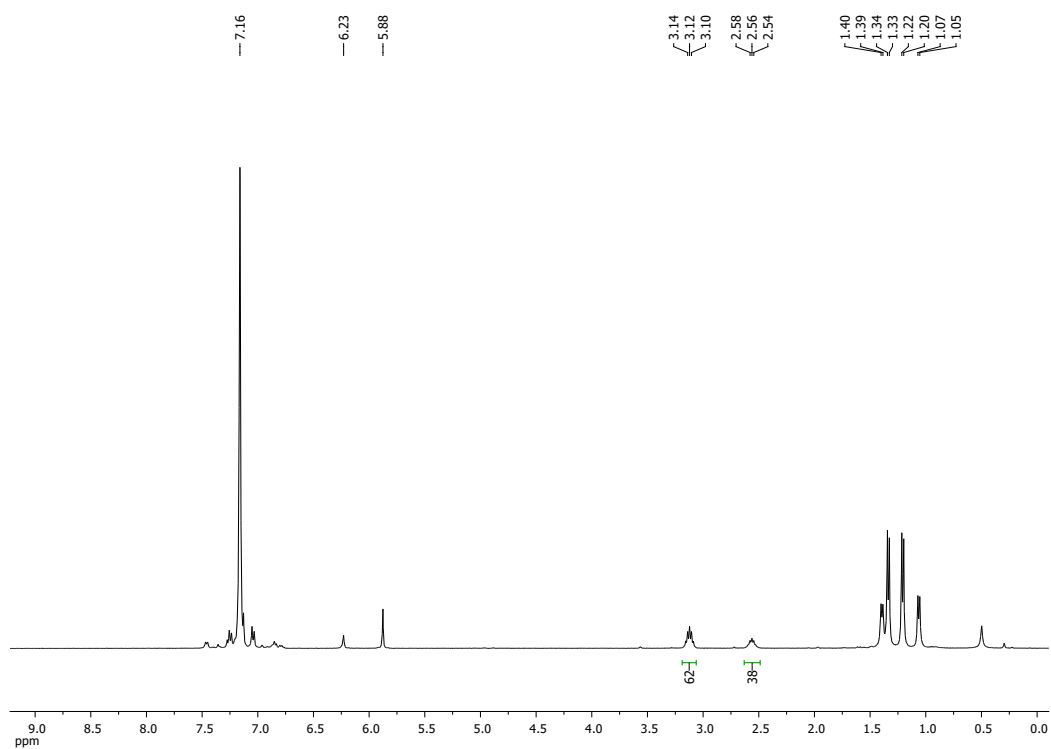

**Figure S4.** Disproportionation ratio of  $[\text{Cu}(\text{IPr})(\text{C}\equiv\text{CPh})]$  **1a** after 72h in benzene (68:62).

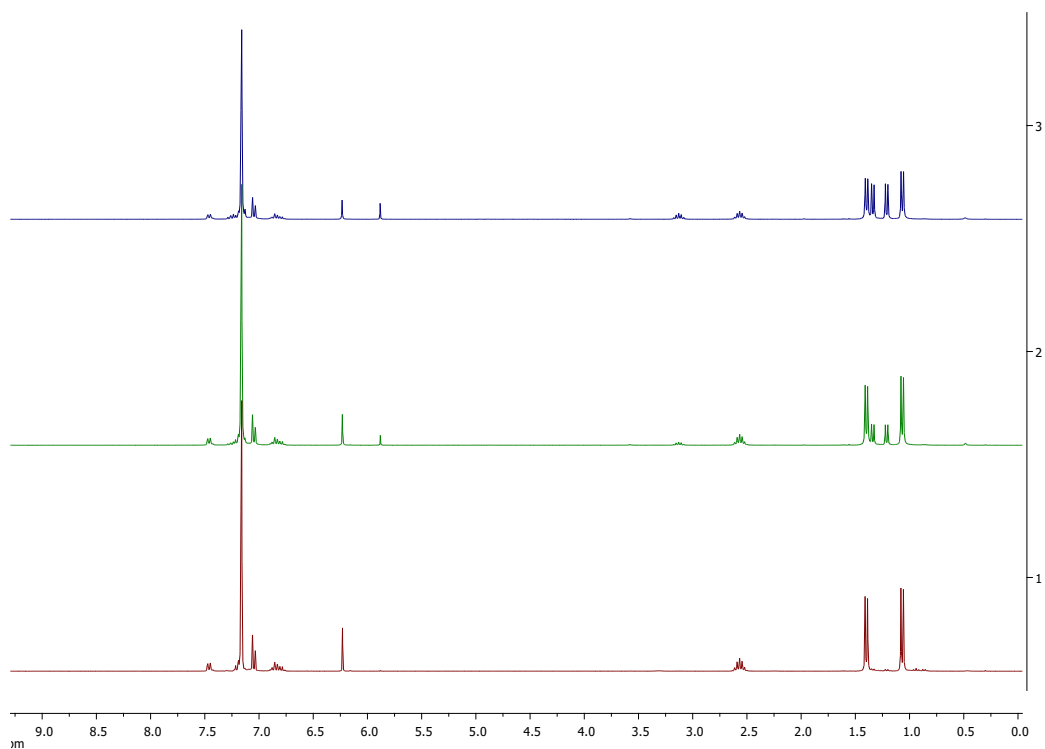

**Figure S5.** Disproportionation ratio of  $[\text{Cu}(\text{IPr})(\text{C}\equiv\text{CPh})]$  **1a** over 24h (1), 48h (2) and 72h (3) in benzene.

## 4. NMR spectra of IPr\*-Cu-alkynyl complexes and their derivatives

### $^1\text{H}$ NMR and $^{13}\text{C}\{^1\text{H}\}$ NMR spectra of $[\text{Cu}(\text{IPr}^*)(\text{phenylacetylide})]$ (**2a**)

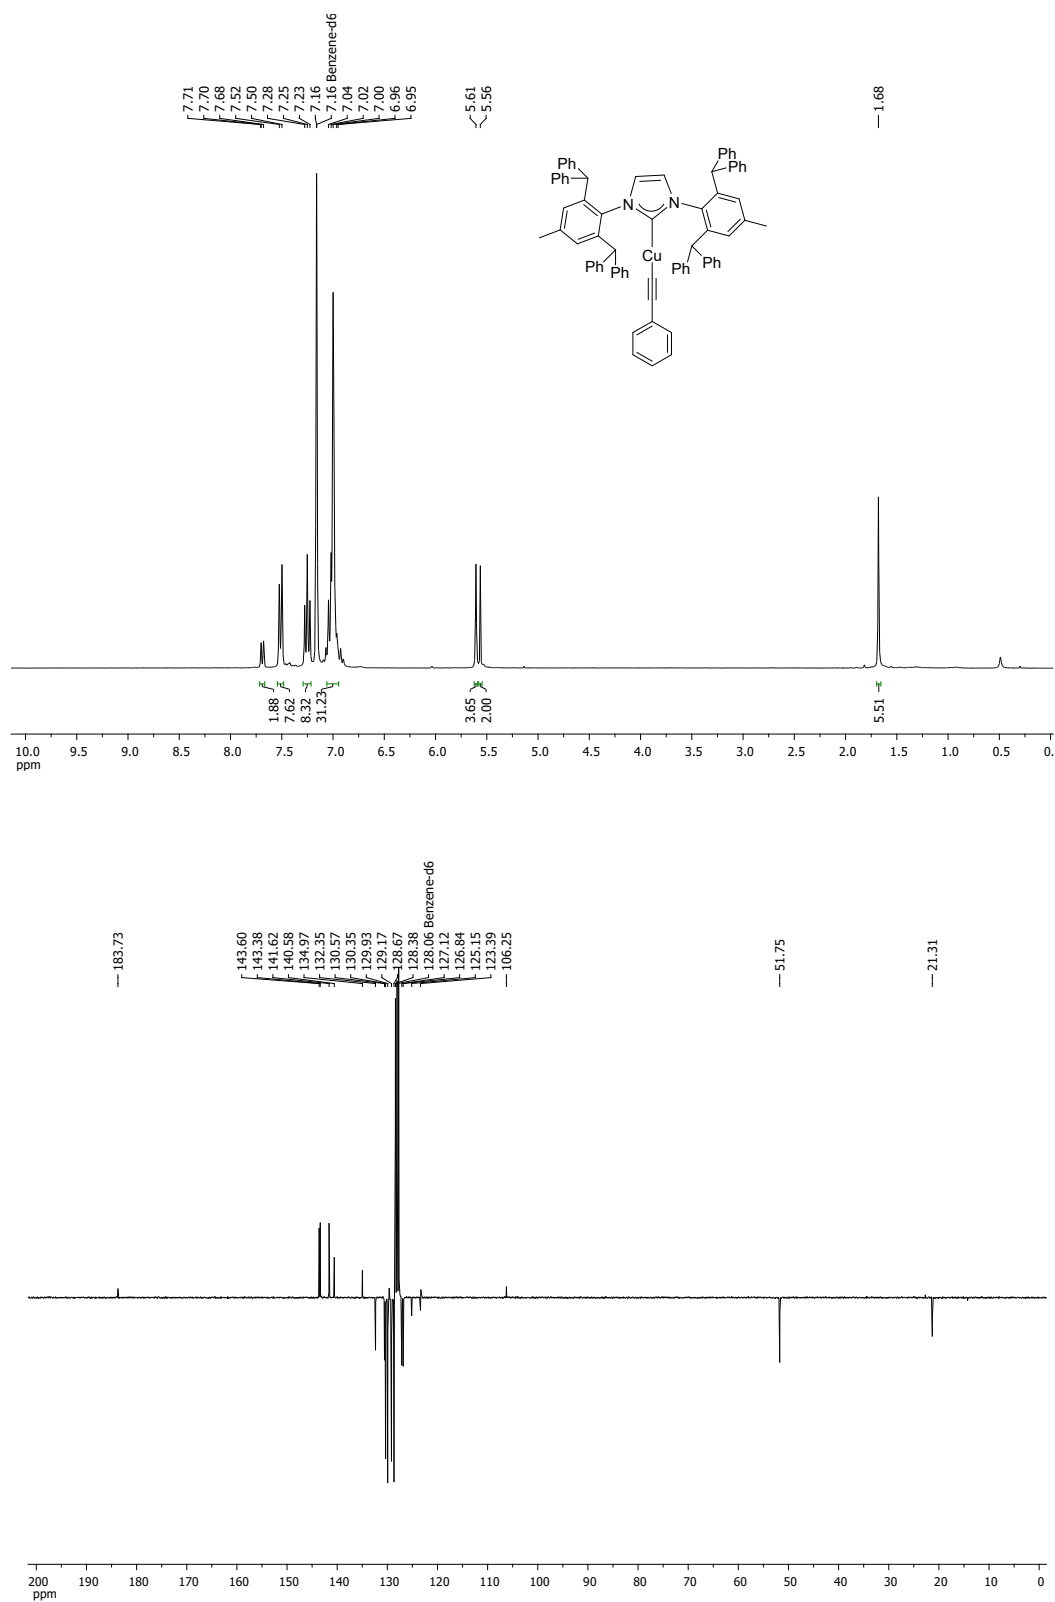

**$^1\text{H}$  NMR and  $^{13}\text{C}\{^1\text{H}\}$  NMR spectra of  $[\text{Cu}(\text{IPr}^*)(4\text{-}t\text{-Bu-phenylacetylide})]$  (2b)**

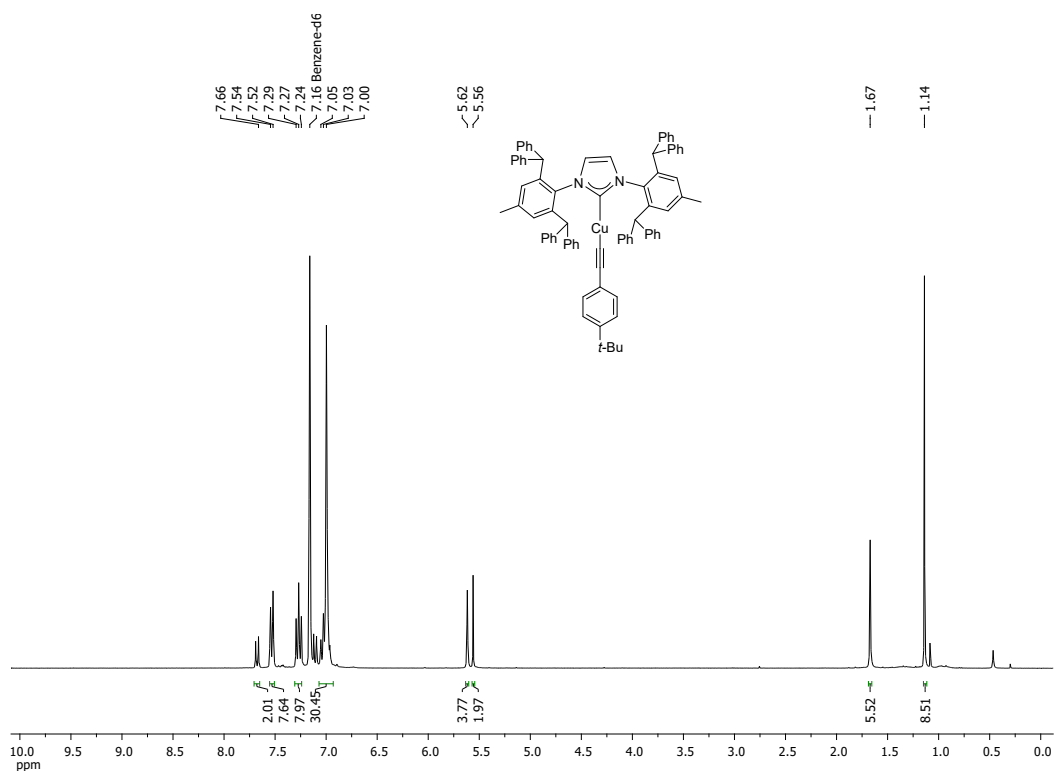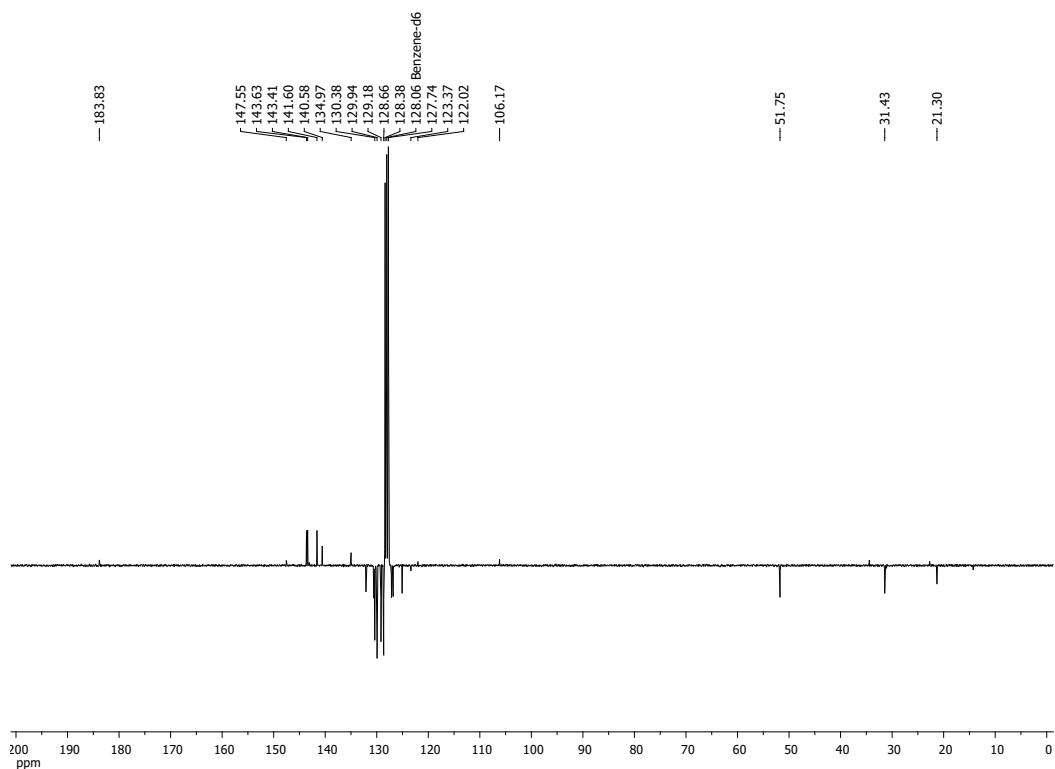

**$^1\text{H}$  NMR and  $^{13}\text{C}\{^1\text{H}\}$  NMR spectra of  $[\text{Cu}(\text{IPr}^*)((2\text{-Chlorophenyl)acetylene}]$  (**2c**)**

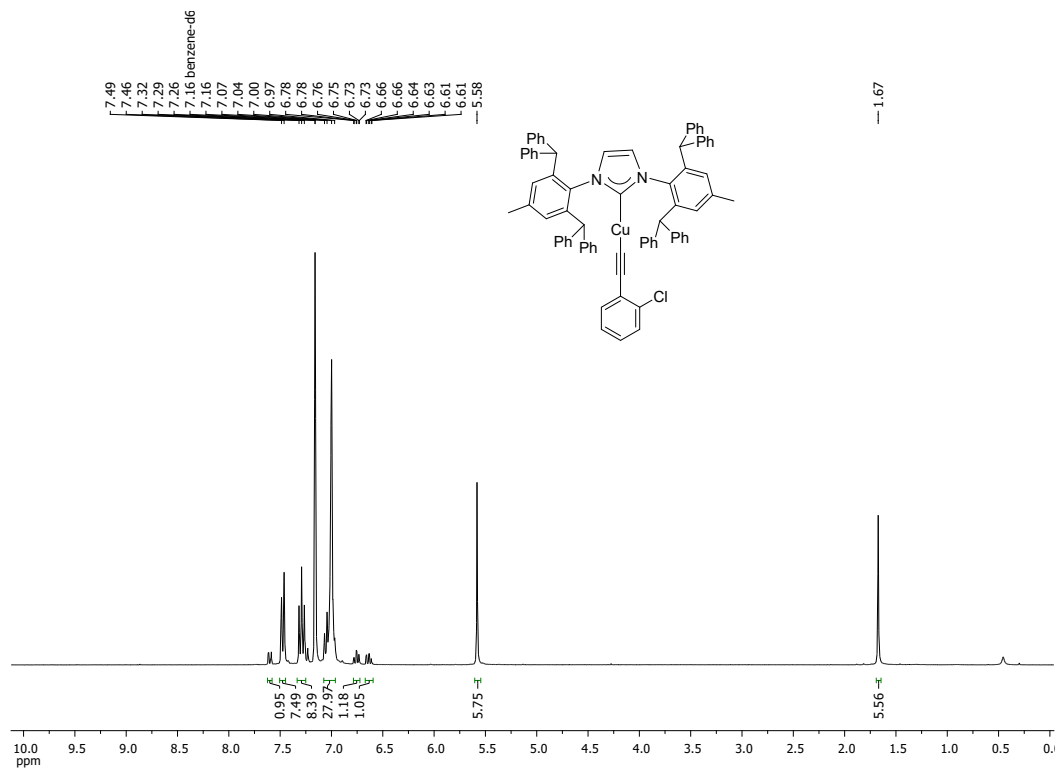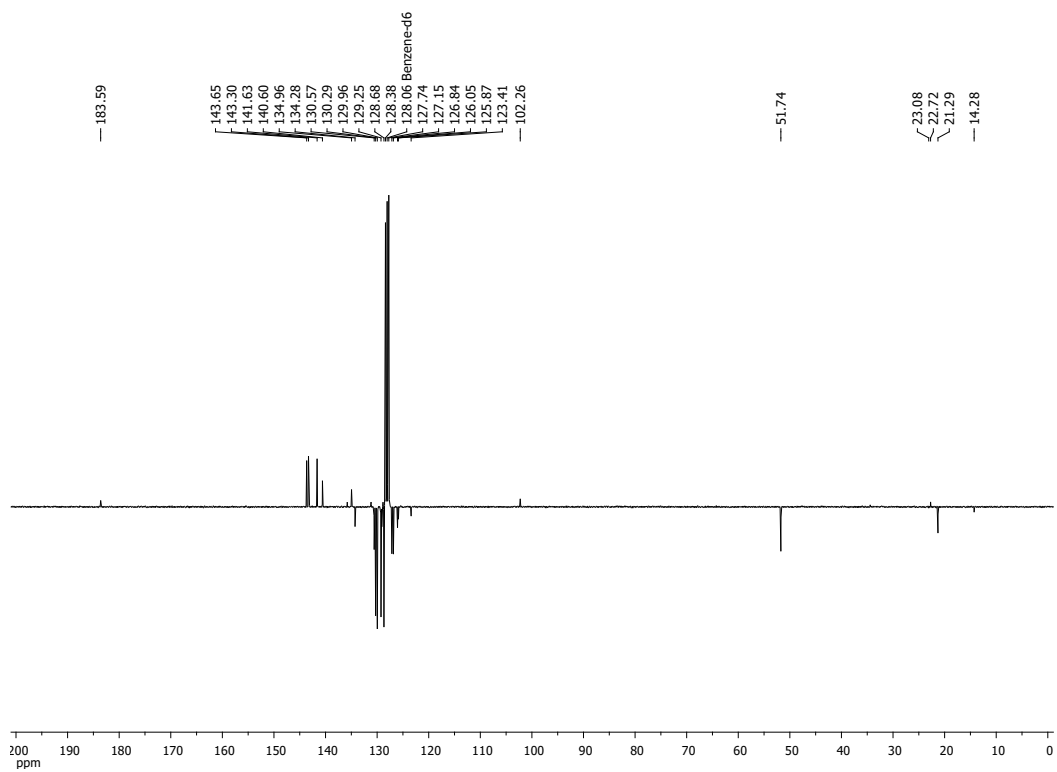

$^1\text{H}$  NMR,  $^{13}\text{C}\{^1\text{H}\}$  NMR and  $^{19}\text{F}\{^1\text{H}\}$  NMR spectra of  $[\text{Cu}(\text{IPr}^*)(2\text{-fluorophenylacetylene})]$  (2d)

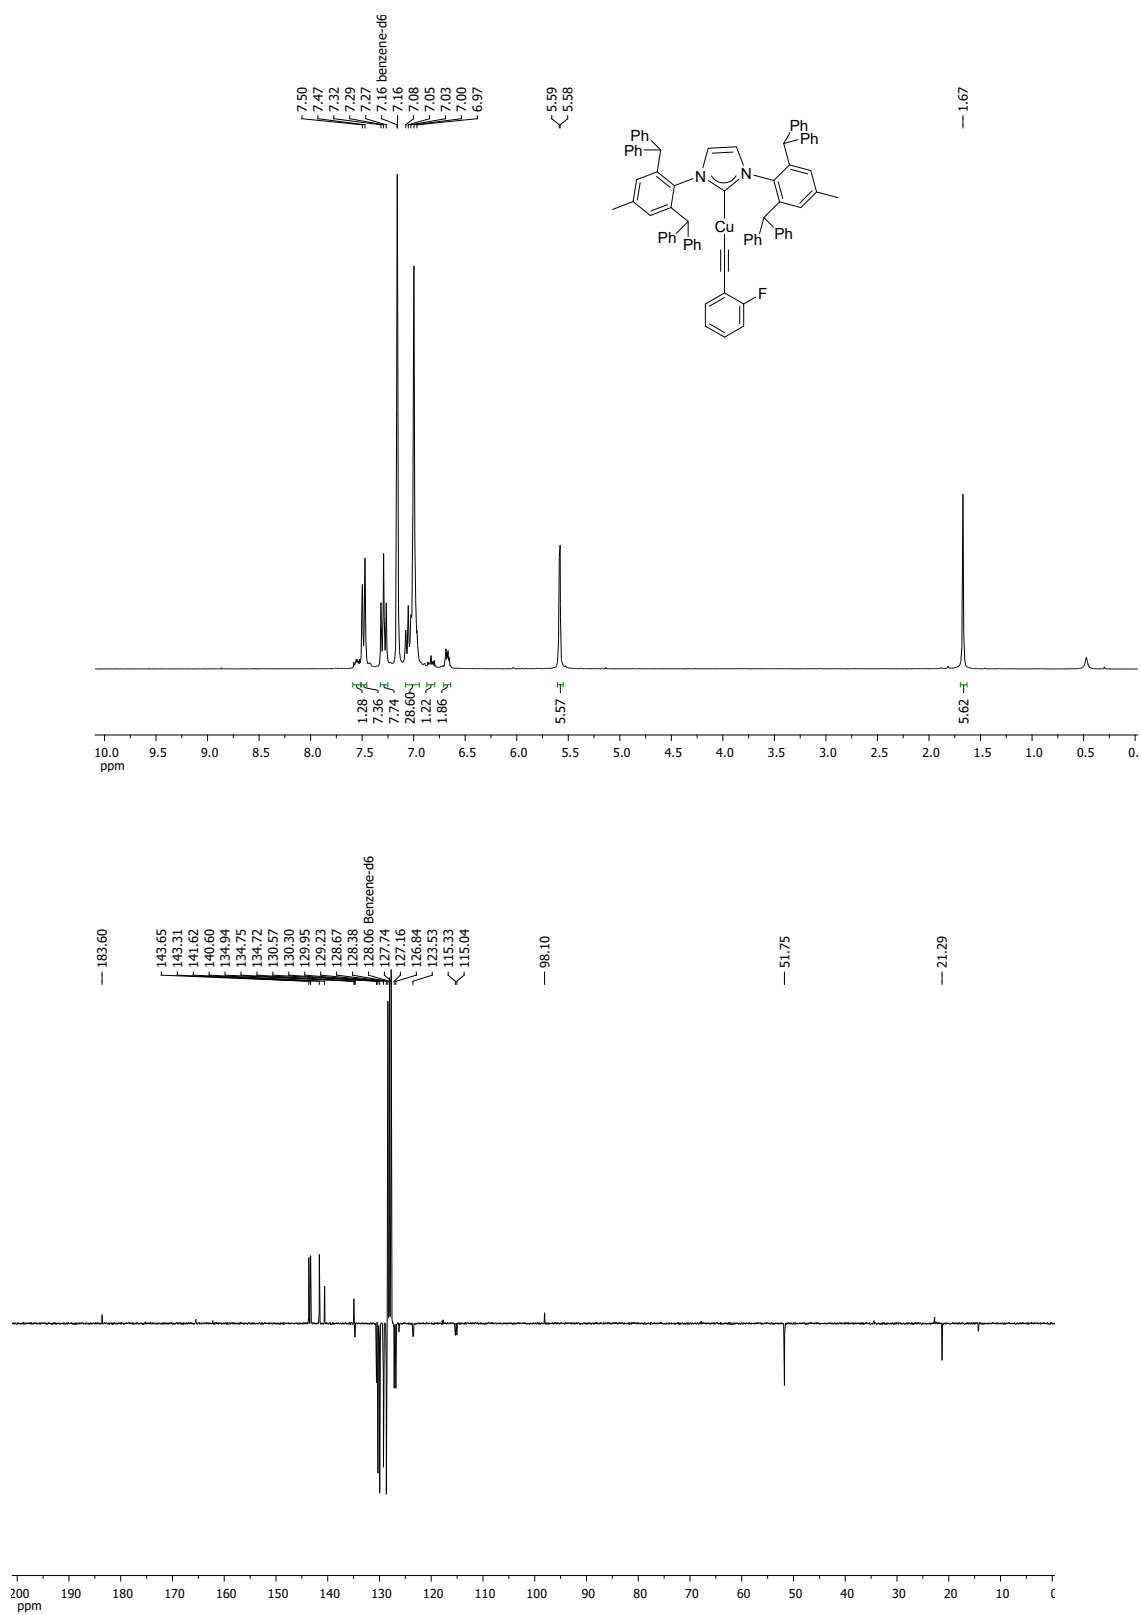



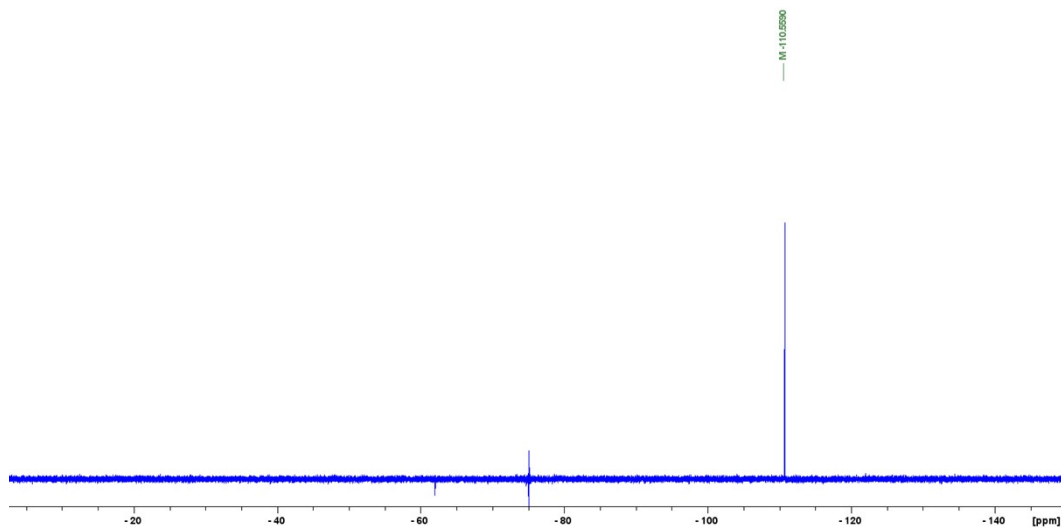

$^1\text{H}$  NMR,  $^{13}\text{C}\{^1\text{H}\}$  NMR and  $^{19}\text{F}\{^1\text{H}\}$  NMR spectra of  $[\text{Cu}(\text{IPr}^*)(4\text{-(CF}_3\text{)phenylacetylene})]$  (**2e**)

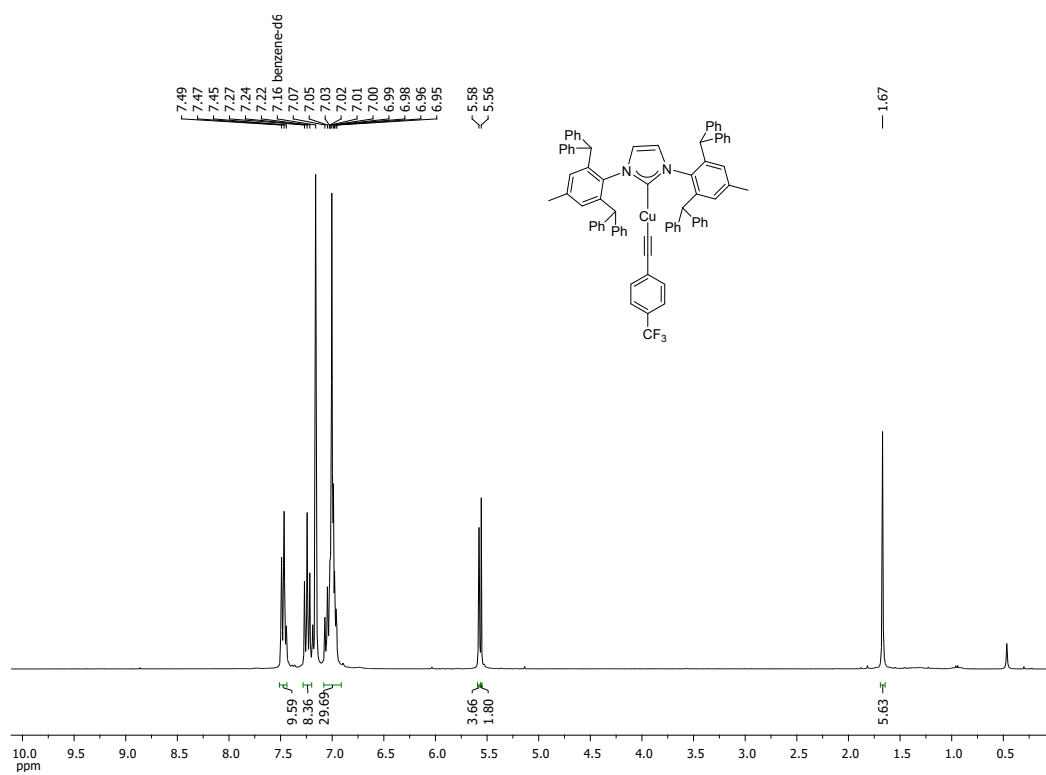

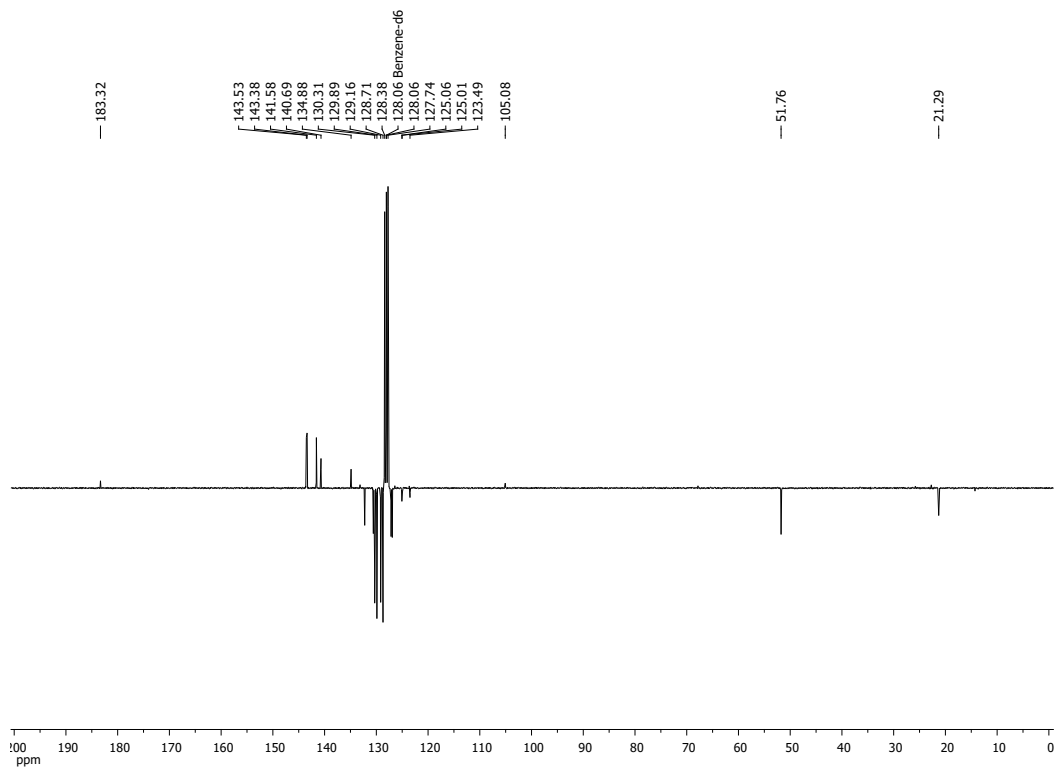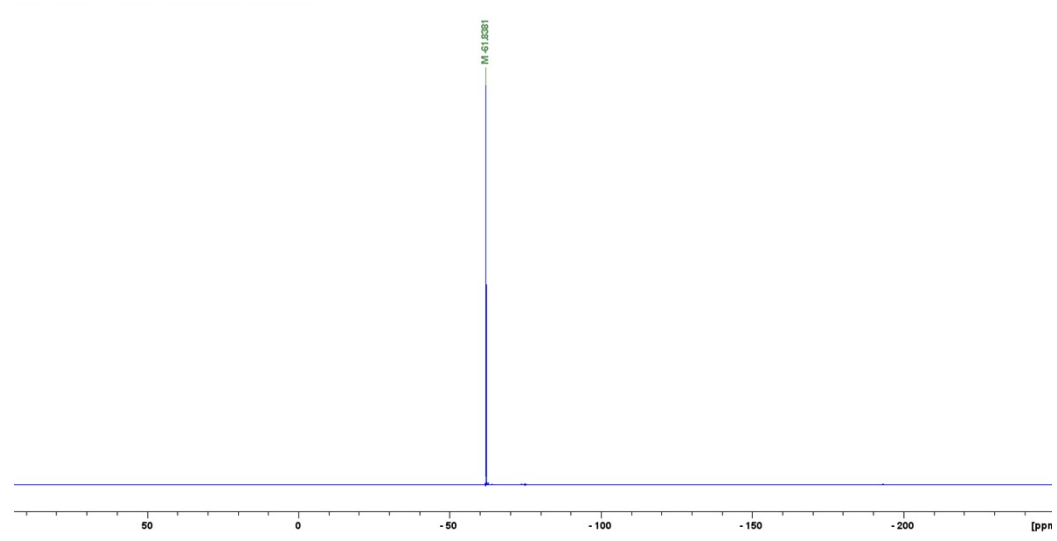

**$^1\text{H}$  NMR and  $^{13}\text{C}\{^1\text{H}\}$  NMR spectra of  $[\text{Cu}(\text{IPr}^*)(4\text{-Methoxyphenylacetylene})]$  (**2f**)**

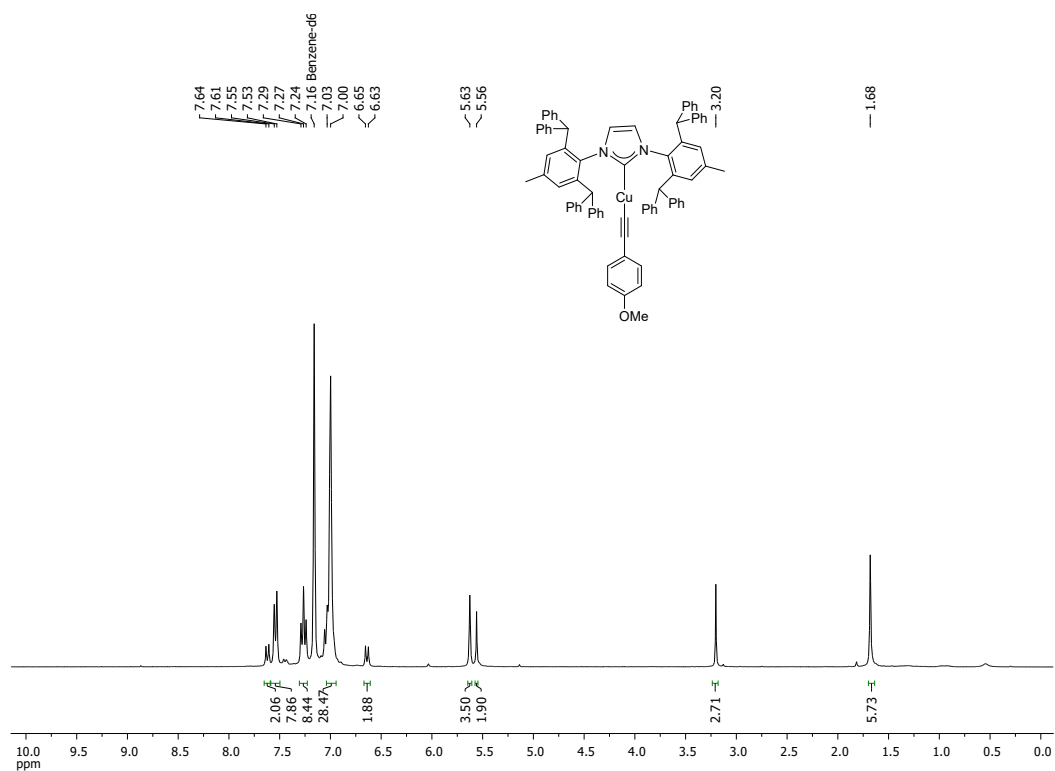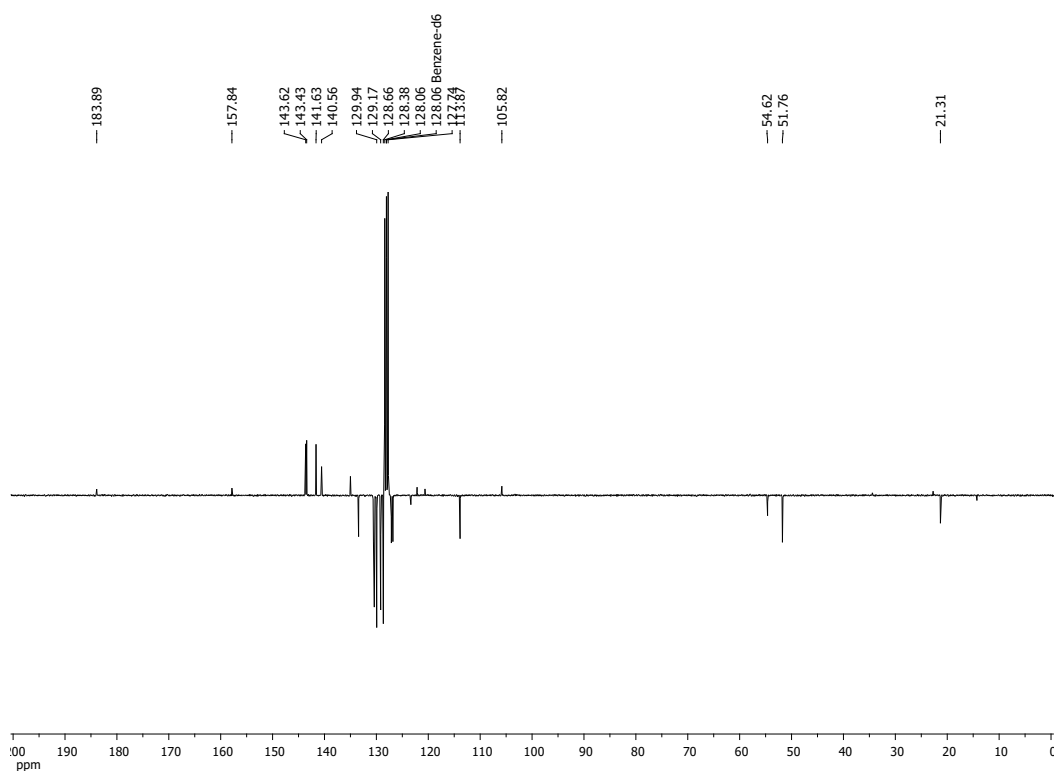

**$^1\text{H}$  NMR,  $^{13}\text{C}\{^1\text{H}\}$  NMR and  $^{19}\text{F}\{^1\text{H}\}$  NMR spectra of  $[\text{Cu}(\text{IPr}^*)(\text{OMess})]$  **2aa****

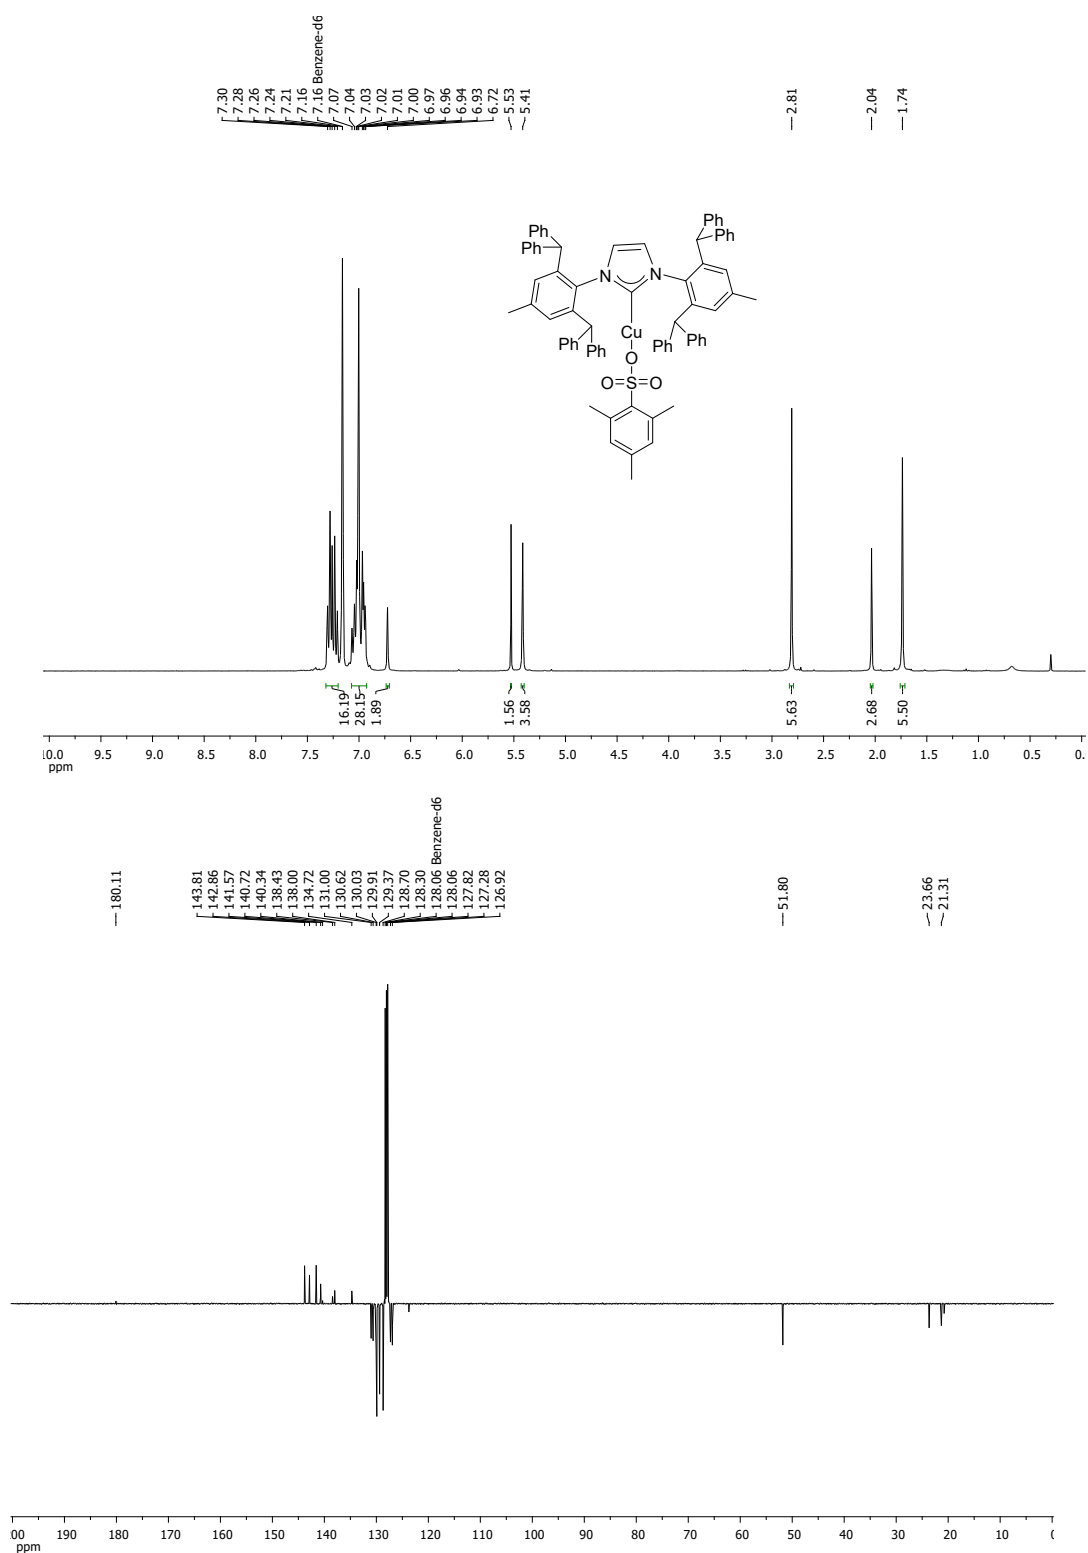

**$^1\text{H}$  NMR,  $^{13}\text{C}\{^1\text{H}\}$  NMR and  $^{19}\text{F}\{^1\text{H}\}$  NMR spectra of  $[\text{Cu}(\text{IPr}^*)(\text{TFA})]$  **2ab****

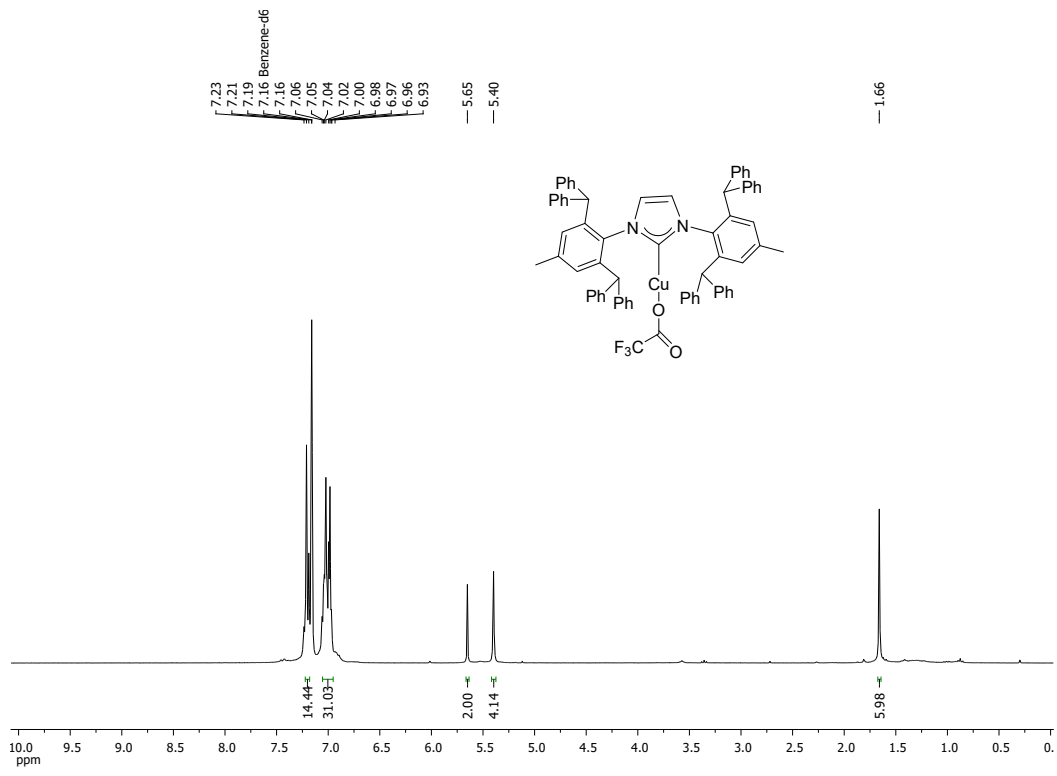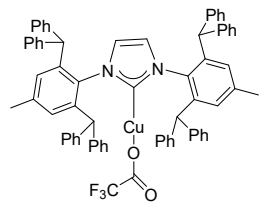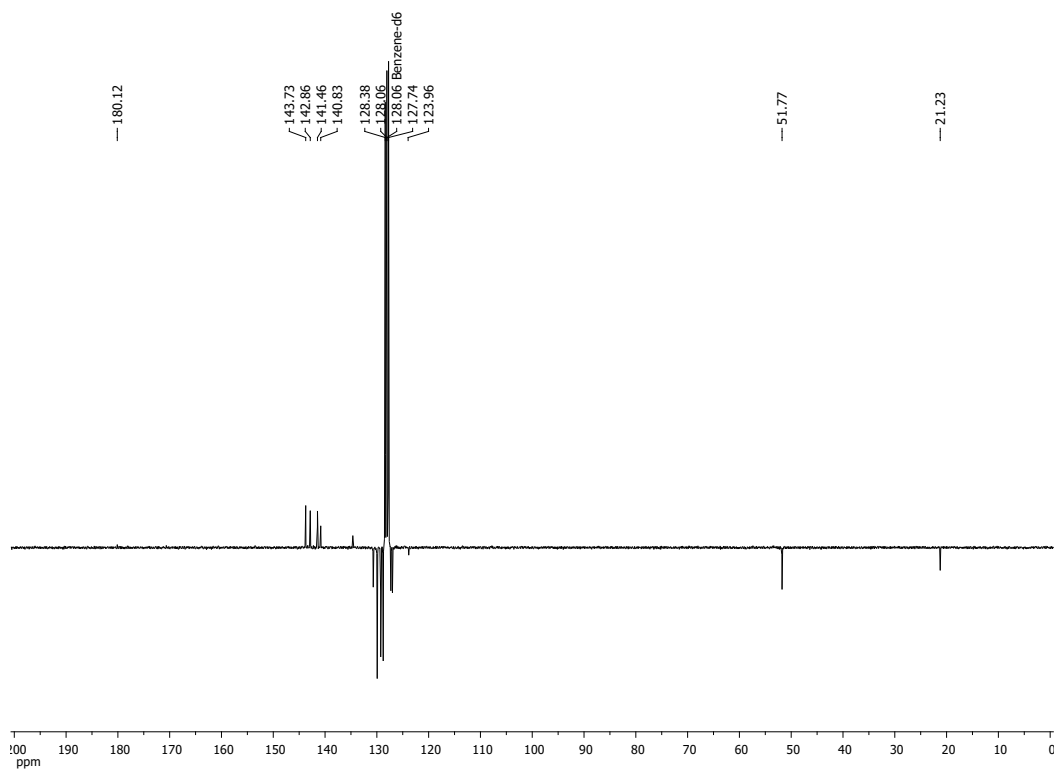

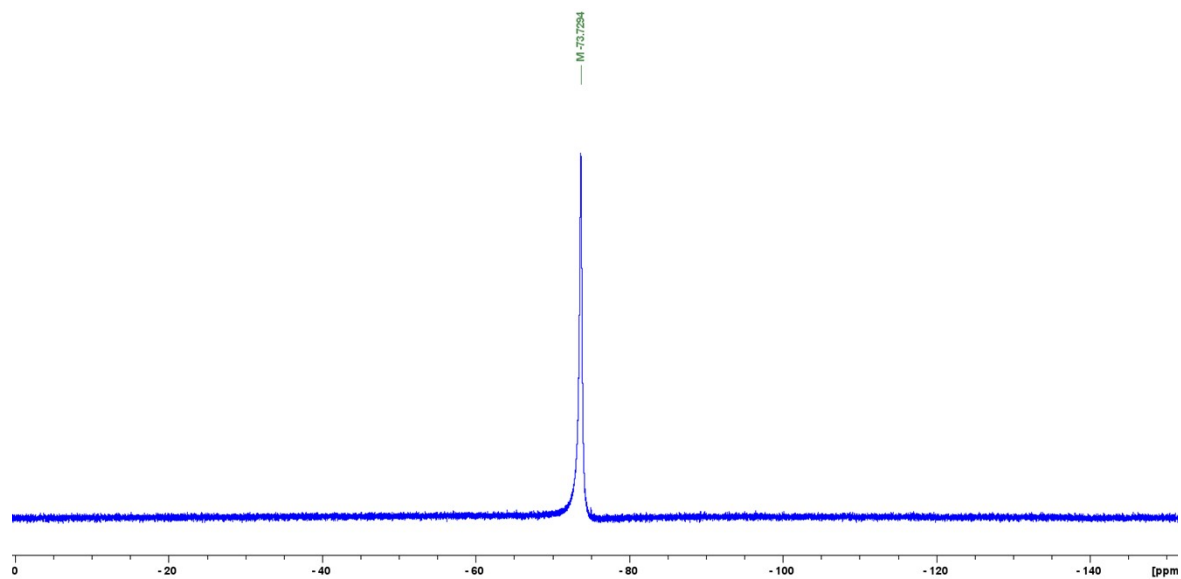

**$^1\text{H}$  NMR and  $^{13}\text{C}\{^1\text{H}\}$  NMR spectra of  $[\text{Cu}(\text{IPr}^*)(\text{OTs})]$  2ac**

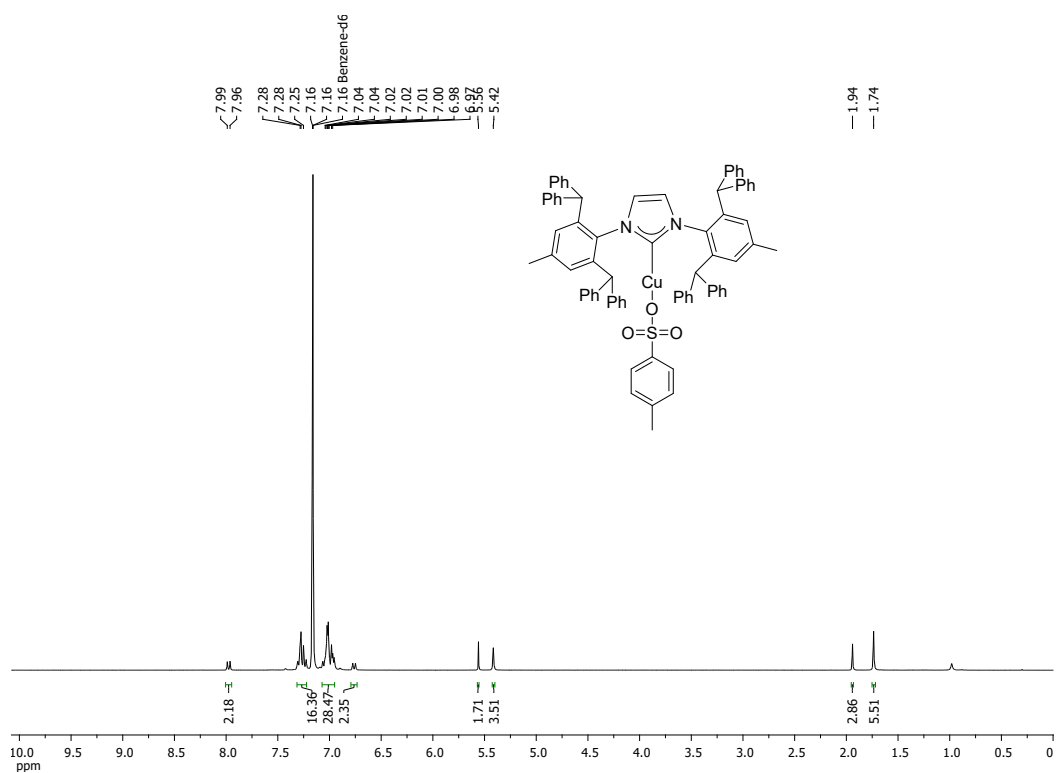

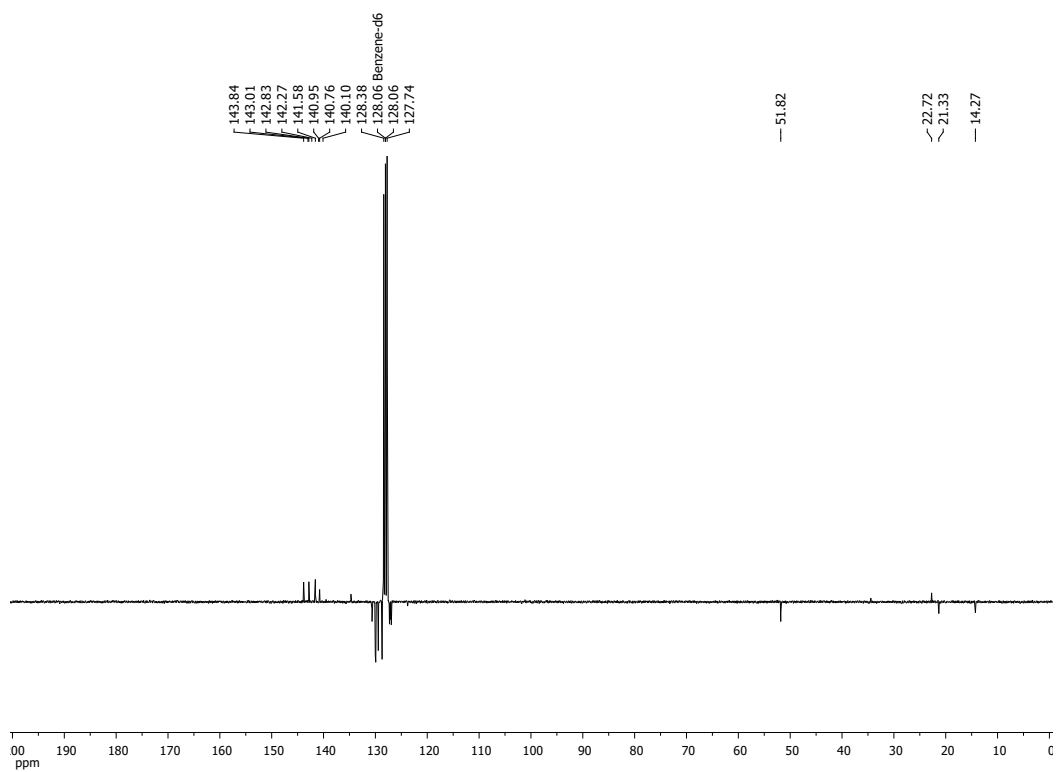

$^1\text{H}$  NMR,  $^{13}\text{C}\{^1\text{H}\}$  NMR and  $^{19}\text{F}\{^1\text{H}\}$  NMR spectra of  $[\text{Cu}(\text{IPr}^*)(\text{OCOC}_6\text{F}_5)]$  2ad

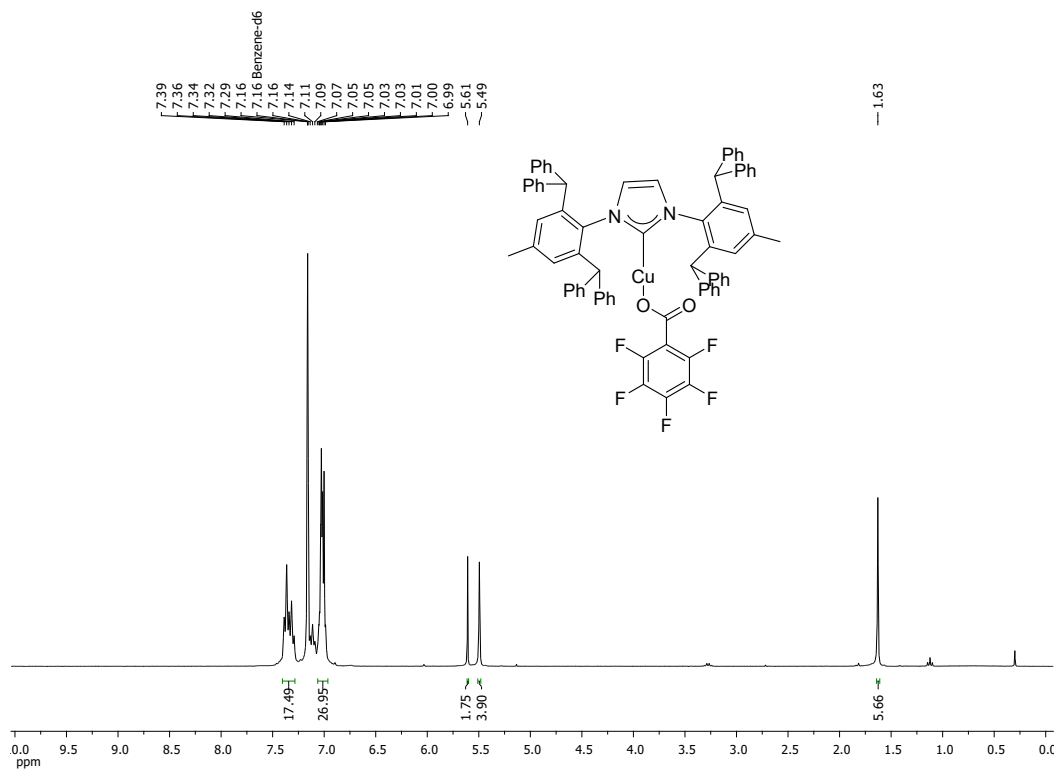

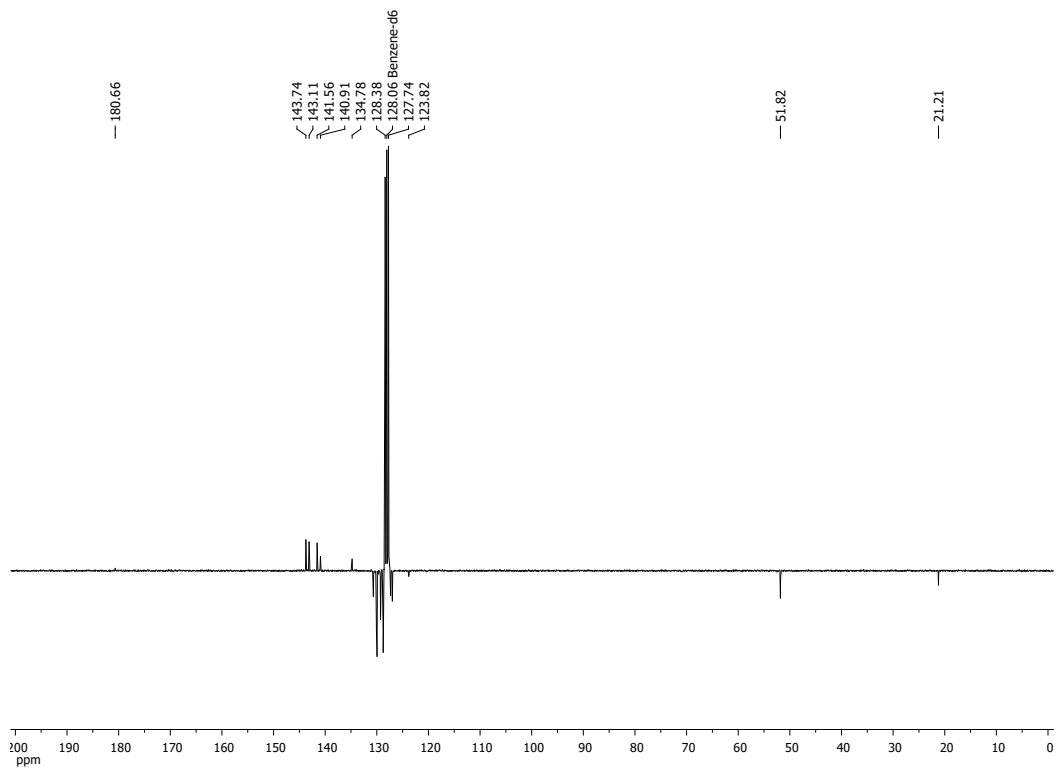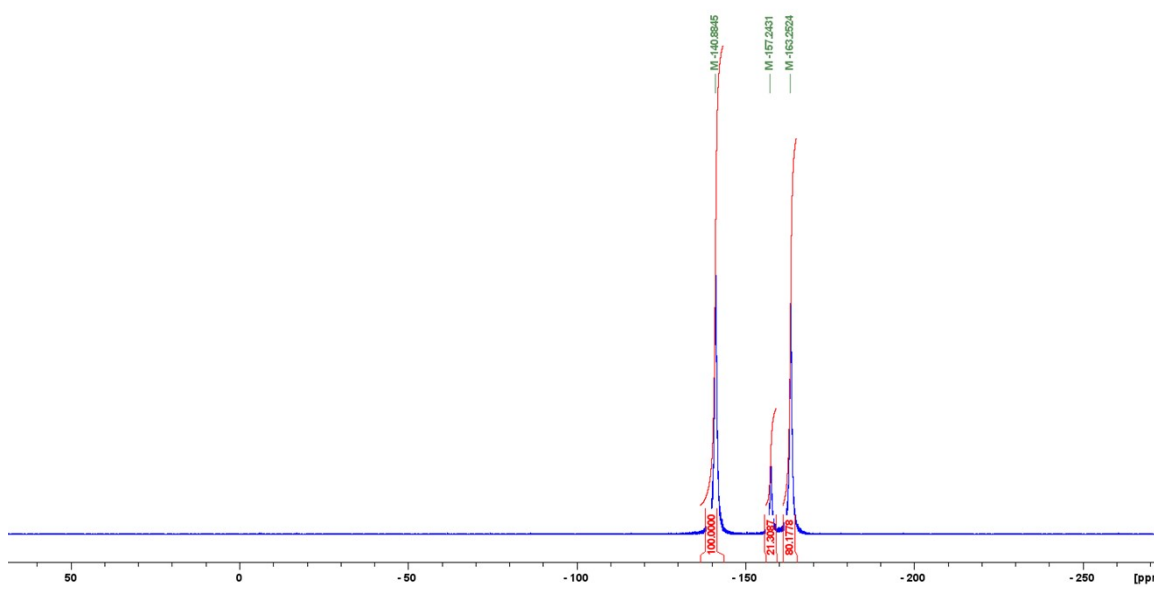



$^1\text{H}$  NMR,  $^{13}\text{C}\{^1\text{H}\}$  NMR and  $^{19}\text{F}\{^1\text{H}\}$  NMR spectra of  $[\text{Cu}(\text{IPr}^*)(\text{OCs})]$  **2ae**

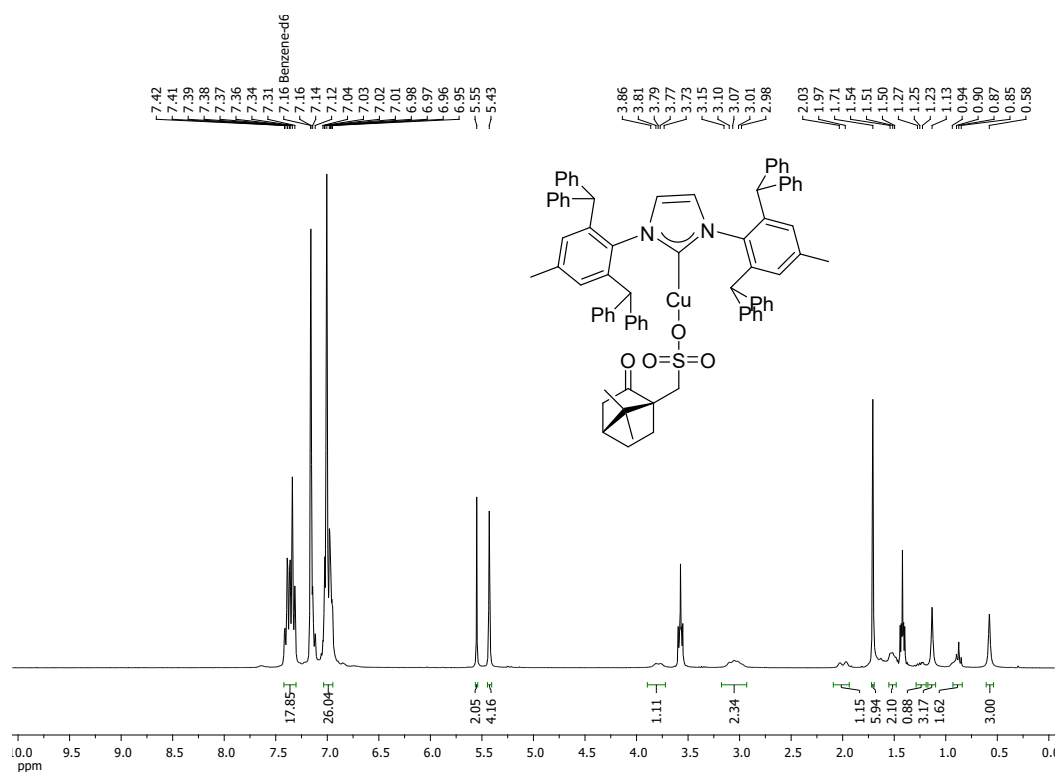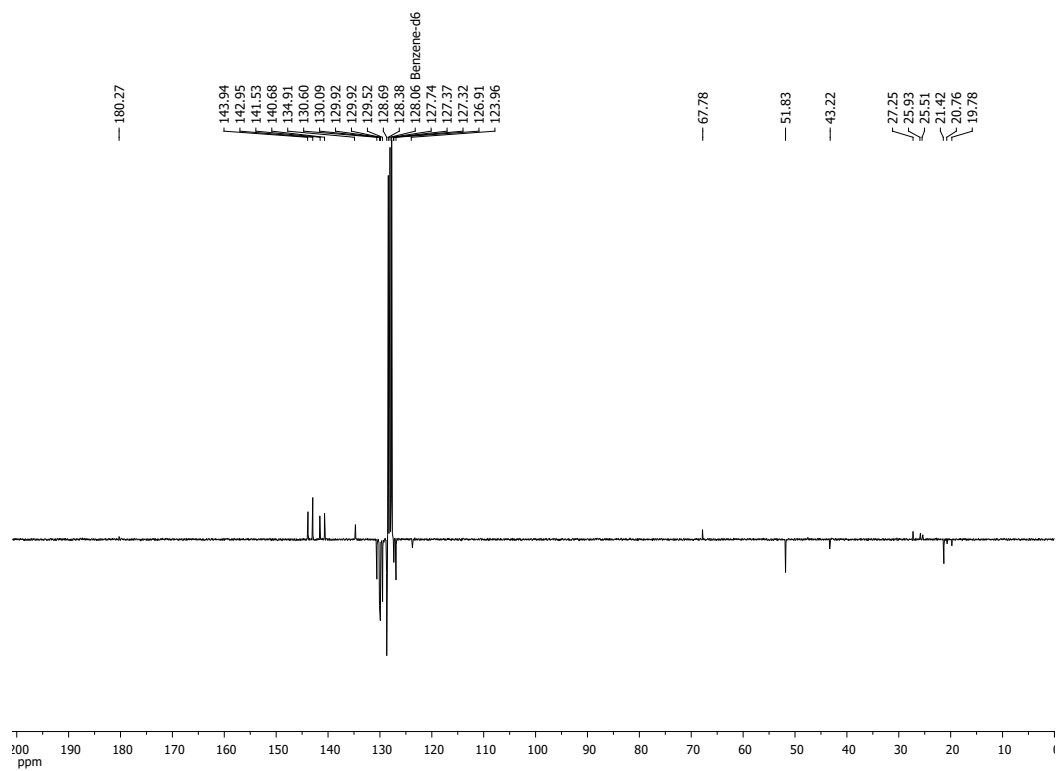

## 5. NMR spectra of NHC-Cu-thiolato complexes

### $^1\text{H}$ NMR and $^{13}\text{C}\{^1\text{H}\}$ NMR spectra of $[\text{Cu}(\text{IPr})(\text{SPh})]$ (**3a**)

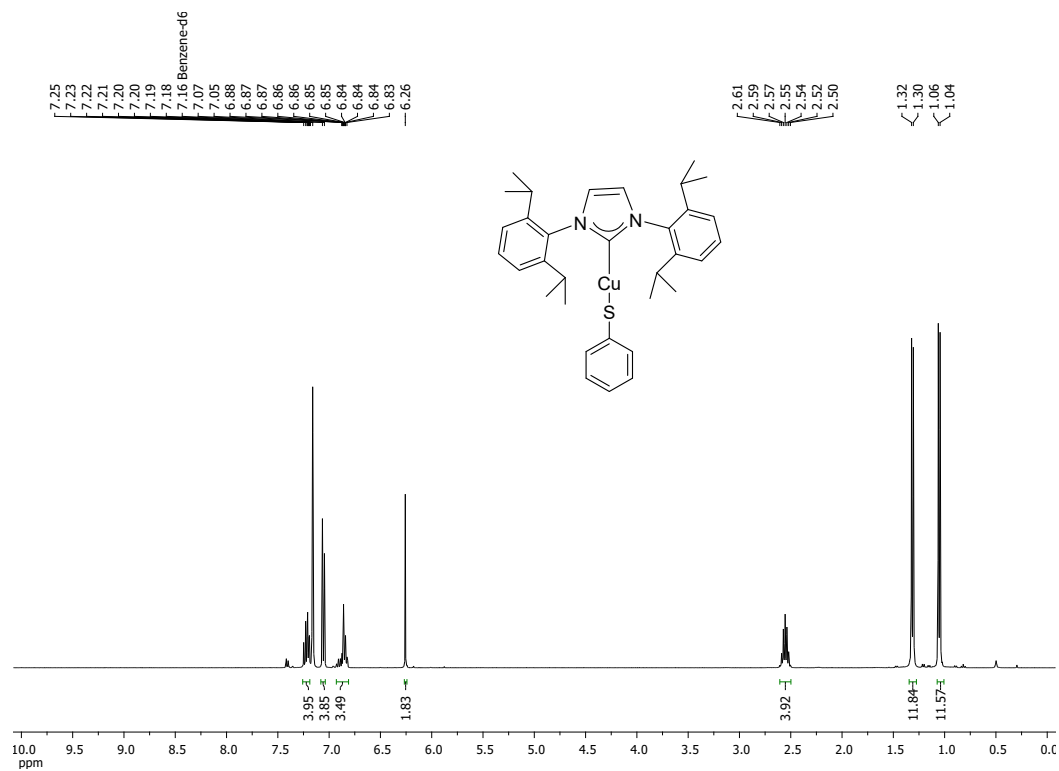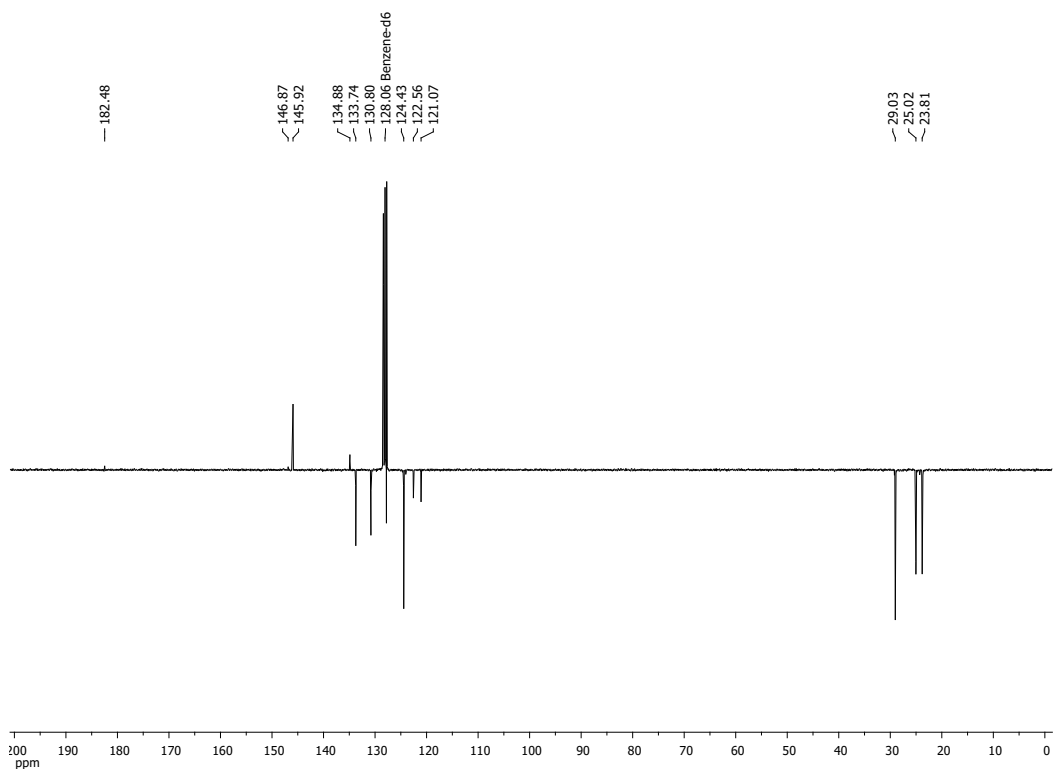

# $^1\text{H}$ NMR and $^{13}\text{C}\{^1\text{H}\}$ NMR spectra of $[\text{Cu}(\text{IPr}^*)(\text{SPh})]$ (**3b**)

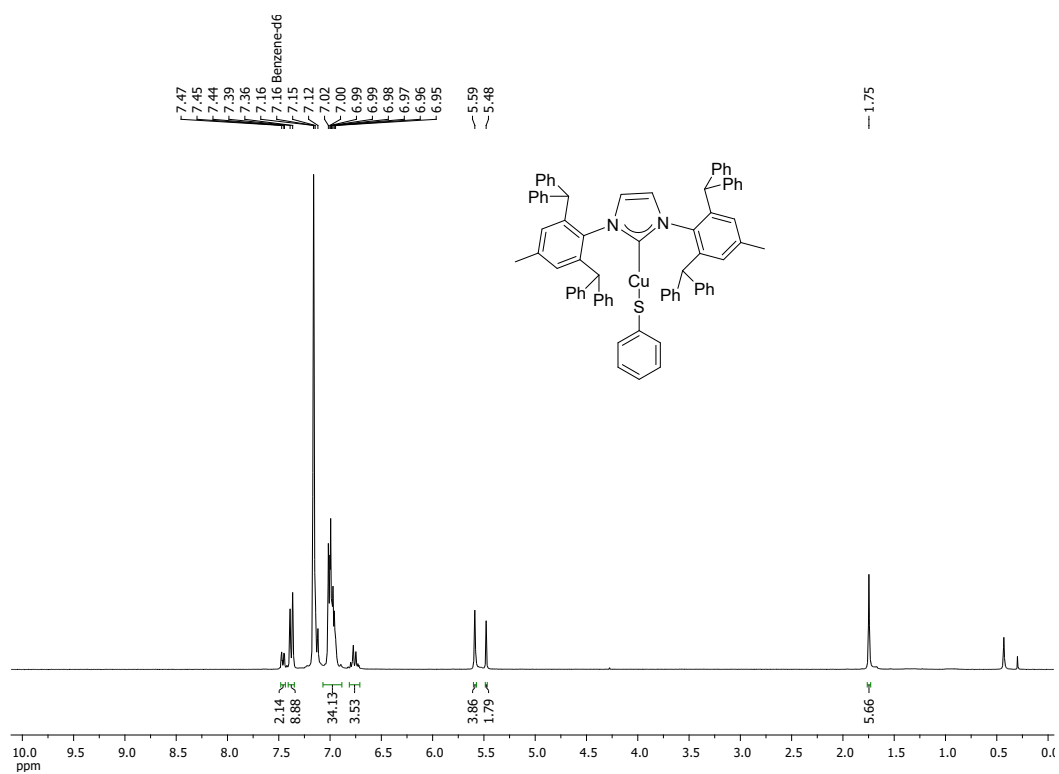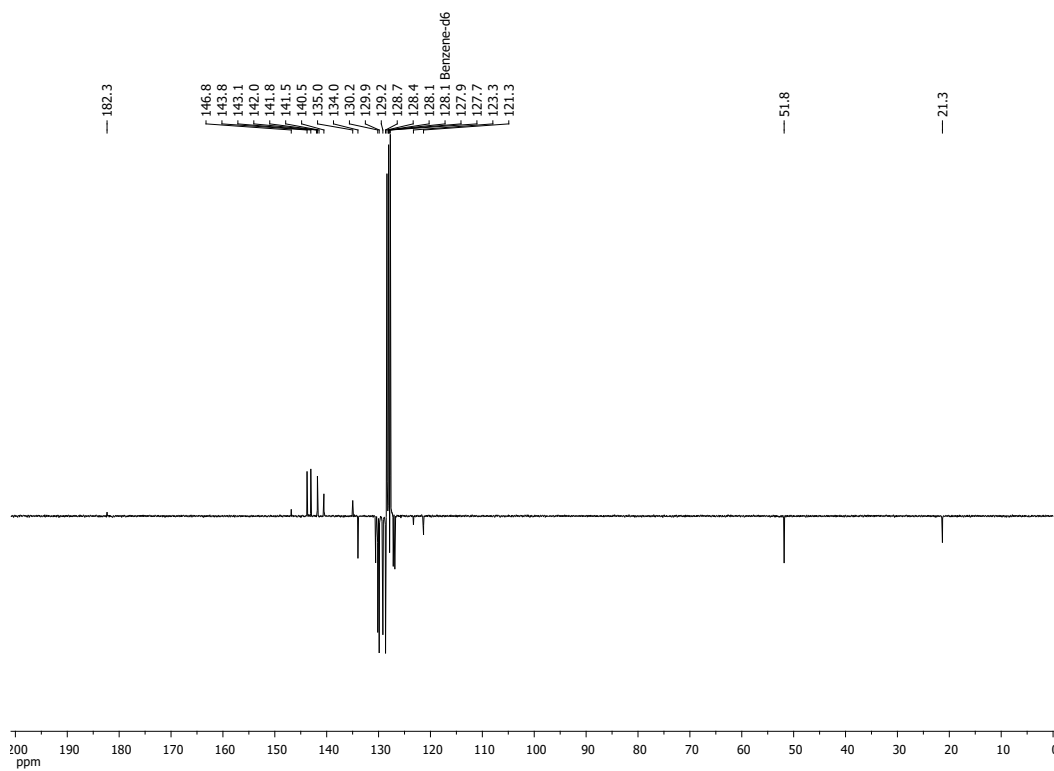

Supplement: d1dt03710b1.pdf [file d1dt03710b1.pdf]
